# Supplementary material
Source: publisher site journal article supplement (http://www.dovepress.com/get_supplementary_file.php?f=283026.docx)
Supplement: Supplementary file 1 [file get_supplementary_file.php]

| Characteristics | Case | CircARPP21 expression | | P value |
| --- | --- | --- | --- | --- |
| Low | High |
| All cases | 55 | 35 | 20 |  |
| Gender .2667 | | | | |
| Male 43 | | 29 | 14 |  |
| Female | 12 | 6 | 6 |  |
| Age(years) |  |  |  | .5076 |
| ＜60 | 27 | 16 | 11 |  |
| ≥60 | 28 | 19 | 9 |  |
| Tumor size（cm） |  |  |  | .0018* |
| ≤5 | 26 | 11 | 15 |  |
| ＞5 | 29 | 24 | 5 |  |
| HBsAg |  |  |  | .4827 |
| Positive | 41 | 25 | 16 |  |
| Negative | 14 | 10 | 4 |  |
| AFP（ng/mL） |  |  |  | .0351* |
| ≤400 | 31 | 16 | 15 |  |
| ＞400 | 24 | 19 | 5 |  |
| Tumor number |  |  |  | .2825 |
| Solitary | 30 | 21 | 9 |  |
| Multiple | 25 | 14 | 11 |  |
| TNM stage |  |  |  | .0008* |
| Ⅰ+Ⅱ | 20 | 7 | 13 |  |
| Ⅲ+Ⅳ | 35 | 28 | 7 |  |

**Table 1** Correlation between clinicopathological characteristicsand CircARPP21 expression level in HCC patients

*indicates p＜0.05
